# Supplementary material
Source: Springer Nature journal article supplement (https://www.springermedizin.de/resource/supplementary/13024_2014_544_MOESM12_ESM.pdf/9644364)
Supplement: MOESM12 [file 9644364]

Table 1. Significant effects of diet and exercise at the level of family.

| Family                | Main effects 2-way ANOVA |          |             | post-hoc testing |                 |             |               |
|-----------------------|--------------------------|----------|-------------|------------------|-----------------|-------------|---------------|
|                       | High fat diet            | exercise | interaction | ND vs HFD        | ND+ex vs HFD+ex | ND vs ND+ex | HFD vs HFD+ex |
| Porphyromonadaceae    | ↓ ****                   | ↓ ***    |             | ****             | ****            | *           | *             |
| Streptococcaceae      | ↑ ****                   | ↓ **     | *           | ****             | **              |             | **            |
| Lachnospiraceae       | ↑ ****                   | ↑ *      |             | ****             | ****            |             |               |
| Erysipelotrichaceae   | ↓ ****                   |          |             | **               | ***             |             |               |
| Clostridiaceae_1      | ↑ ****                   |          |             | **               | ****            | *           |               |
| Ruminococcaceae       | ↑ ****                   |          |             |                  | ***             |             |               |
| Peptostreptococcaceae | ↑ ***                    | ↑ ***    | **          |                  | ***             |             | ***           |
| Eubacteriaceae        | ↑ ***                    |          | *           |                  | **              |             |               |
| Peptococcaceae_1      | ↓ **                     | ↓ **     | **          | **               |                 | **          |               |
| Anaeroplasmataceae    | ↓ **                     |          | *           | **               |                 | *           |               |
| Staphylococcaceae     | ↓ **                     |          |             |                  |                 |             |               |
| Cryomorphaceae        | ↑ *                      | ↑ **     | *           |                  | **              | **          |               |
| Phyllobacteriaceae    | ↑ *                      | ↑ *      |             |                  | *               |             | *             |
| Alcaligenaceae        | ↑ *                      | ↑ *      |             |                  |                 |             |               |
| Pseudomonadaceae      | ↑ *                      | ↑ *      |             |                  | *               |             | *             |
| Bacteroidaceae        | ↑ *                      |          |             | *                |                 |             |               |
| Veillonellaceae       | ↑ *                      |          |             |                  |                 |             |               |
| Enterobacteriaceae    | ↑ *                      |          |             |                  |                 |             |               |
| Lactobacillaceae      | ↑ *                      |          |             |                  |                 |             |               |
| Gracilibacteraceae    | ↑ *                      |          |             |                  |                 |             |               |
| Peptococcaceae_2      |                          | ↓ ***    |             |                  |                 | *           |               |
| Rhizobiaceae          |                          | ↑ **     |             |                  |                 |             |               |
| Incertae_Sedis_IV     |                          | ↑ **     |             |                  |                 | *           |               |
| Microbacteriaceae     |                          | ↑ *      |             |                  |                 |             |               |
| Nocardiaceae          |                          | ↑ *      |             |                  |                 |             |               |
| Coriobacteriaceae     |                          | ↑ *      |             |                  |                 | *           |               |
| Flavobacteriaceae     |                          | ↑ *      |             |                  |                 |             | *             |
| Sphingobacteriaceae   |                          | ↑ *      |             |                  | *               |             | *             |
| Bradyrhizobiaceae     |                          | ↑ *      |             |                  |                 |             |               |
| Caulobacteraceae      |                          | ↑ *      |             |                  |                 |             | *             |
| Burkholderiaceae      |                          | ↑ *      |             |                  |                 |             | *             |
| Comamonadaceae        |                          | ↑ *      |             |                  |                 |             |               |
